# Supplementary material for: Diversity of Algerian oases date palm (Phoenix dactylifera L., Arecaceae): Heterozygote excess and cryptic structure suggest farmer management had a major impact on diversity
Source: PubMed Central journal article supplement (PMC5391916; doi:10.1371/journal.pone.0175232), 2017-04-14
Supplement: pone.0175232.s005.pdf [file pone.0175232.s005.pdf]

**S4 Table.** P-value of allelic richness between oases calculated by the Wilcoxon test.

|             | Biskra | Touggourt | Oued Souf | Ouargla | Ghardaia | Tamanrasset | El Menia | Timimoun | Adrar   | Beni Abbes |
|-------------|--------|-----------|-----------|---------|----------|-------------|----------|----------|---------|------------|
| Biskra      |        | 0.8176    | 0.05688   | 0.1901  | 0.6777   | 0.2247      | 0.8176   | 0.3289   | 0.6112  | 0.05054    |
| Touggourt   |        |           | 0.1148    | 0.1055  | 0.8176   | 0.2891      | 0.816    | 0.306    | 0.5791  | 0.06483    |
| Oued Souf   |        |           |           | 0.6603  | 0.1743   | 0.5872      | 0.1272   | 0.8176   | 0.05688 | 0.1594     |
| Ouargla     |        |           |           |         | 0.2435   | 0.3935      | 0.1272   | 0.463    | 0.2633  | 1.0000     |
| Ghardaia    |        |           |           |         |          | 0.4874      | 0.9632   | 0.4874   | 0.9265  | 0.05224    |
| Tamanrasset |        |           |           |         |          |             | 0.518    | 1.0000   | 0.4874  | 0.3318     |
| El Menia    |        |           |           |         |          |             |          | 0.306    | 0.89    | 0.07968    |
| Timimoun    |        |           |           |         |          |             |          |          | 0.2247  | 0.1202     |
| Adrar       |        |           |           |         |          |             |          |          |         | 0.002487   |
| Beni Abbes  |        |           |           |         |          |             |          |          |         |            |

The bonferroni corrected p-value for 40 tests is 0.00125.
