# Supplementary material for: Diversity of Algerian oases date palm (Phoenix dactylifera L., Arecaceae): Heterozygote excess and cryptic structure suggest farmer management had a major impact on diversity
Source: PubMed Central journal article supplement (PMC5391916; doi:10.1371/journal.pone.0175232), 2017-04-14
Supplement: pone.0175232.s009.pdf [file pone.0175232.s009.pdf]

**S8 Table.** P-value of allelic richness between Structure populations calculated by the Wilcoxon test.

---

|              | population 1 | population 2 | population 3 |
|--------------|--------------|--------------|--------------|
| population 1 |              | 0.007734     | 0.003159     |
| population 2 |              |              | 0.1743       |
| population 3 |              |              |              |

---
